# Supplementary material for: Cold-responsive adipocyte progenitors couple adrenergic signaling to immune cell activation to promote beige adipocyte accrual
Source: PubMed Central journal article supplement — Genes Dev. 2021 Oct 1;35(19-20):1333–8. doi: 10.1101/gad.348762.121 (PMC8494206; doi:10.1101/gad.348762.121), 2021-10-01
Supplement: supp_gad.348762.121_Supplemental_Fig_S1.pdf [file supp_gad.348762.121_Supplemental_Fig_S1.pdf]

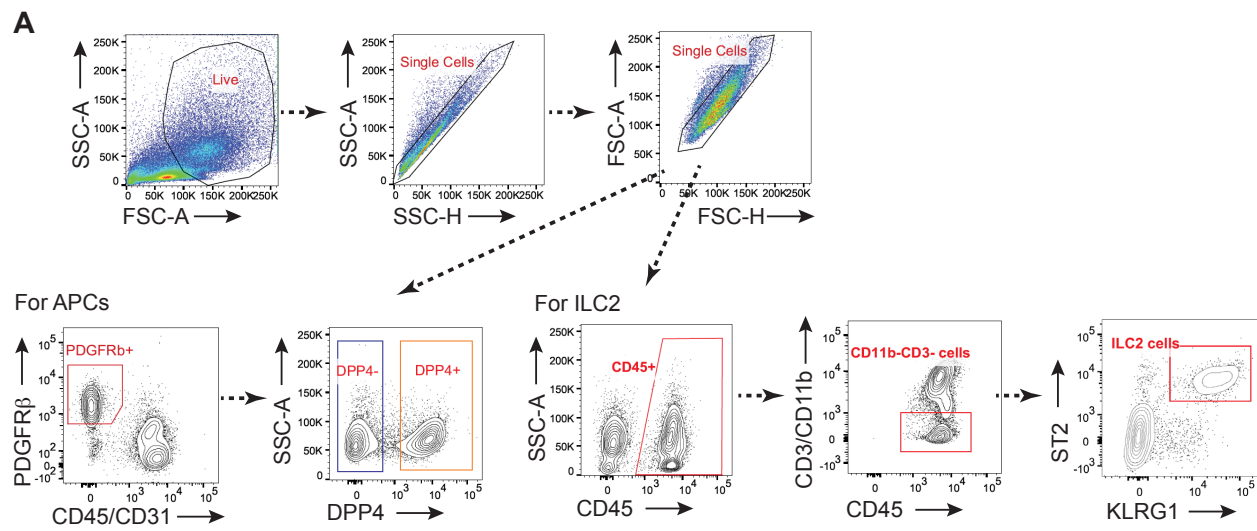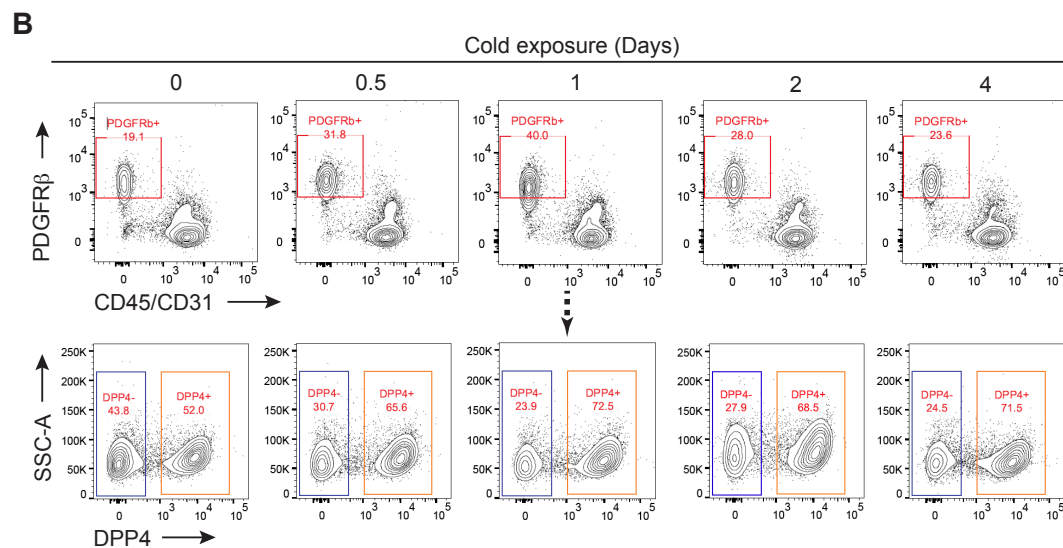

**Fig. S1. Flow cytometry gating strategies.**

**A)** iWAT APC subpopulations and ILC2 are separated using a multi-step gating strategy. Live single cells are selected based on forward- and side-scatter. PDGFR $\beta$ <sup>+</sup> APCs are separated from CD45<sup>+</sup> (hematopoietic) and CD31<sup>+</sup> (endothelial) lineage cells and then further subdivided based on DPP4 expression. ST2<sup>+</sup>KLRG1<sup>+</sup> ILC2 cells are selected from CD45<sup>+</sup> CD3e<sup>-</sup> CD11b<sup>-</sup> cells.

**B)** Representative density plots depicting the quantification of DPP4<sup>+</sup> and DPP4<sup>-</sup> PDGFR $\beta$ <sup>+</sup> cells with the iWAT SVF of mice exposed to cold (6 °C) for 0.5, 1, 2, or 4, days. Mice housed in RT (22 °C) were used as controls (“0”). Frequencies of each gated subpopulation represents the percentage of cells within the parent gated population.
