# Supplementary material for: Cold-responsive adipocyte progenitors couple adrenergic signaling to immune cell activation to promote beige adipocyte accrual
Source: PubMed Central journal article supplement — Genes Dev. 2021 Oct 1;35(19-20):1333–8. doi: 10.1101/gad.348762.121 (PMC8494206; doi:10.1101/gad.348762.121), 2021-10-01
Supplement: supp_gad.348762.121_Supplemental_Fig_S2.pdf [file supp_gad.348762.121_Supplemental_Fig_S2.pdf]

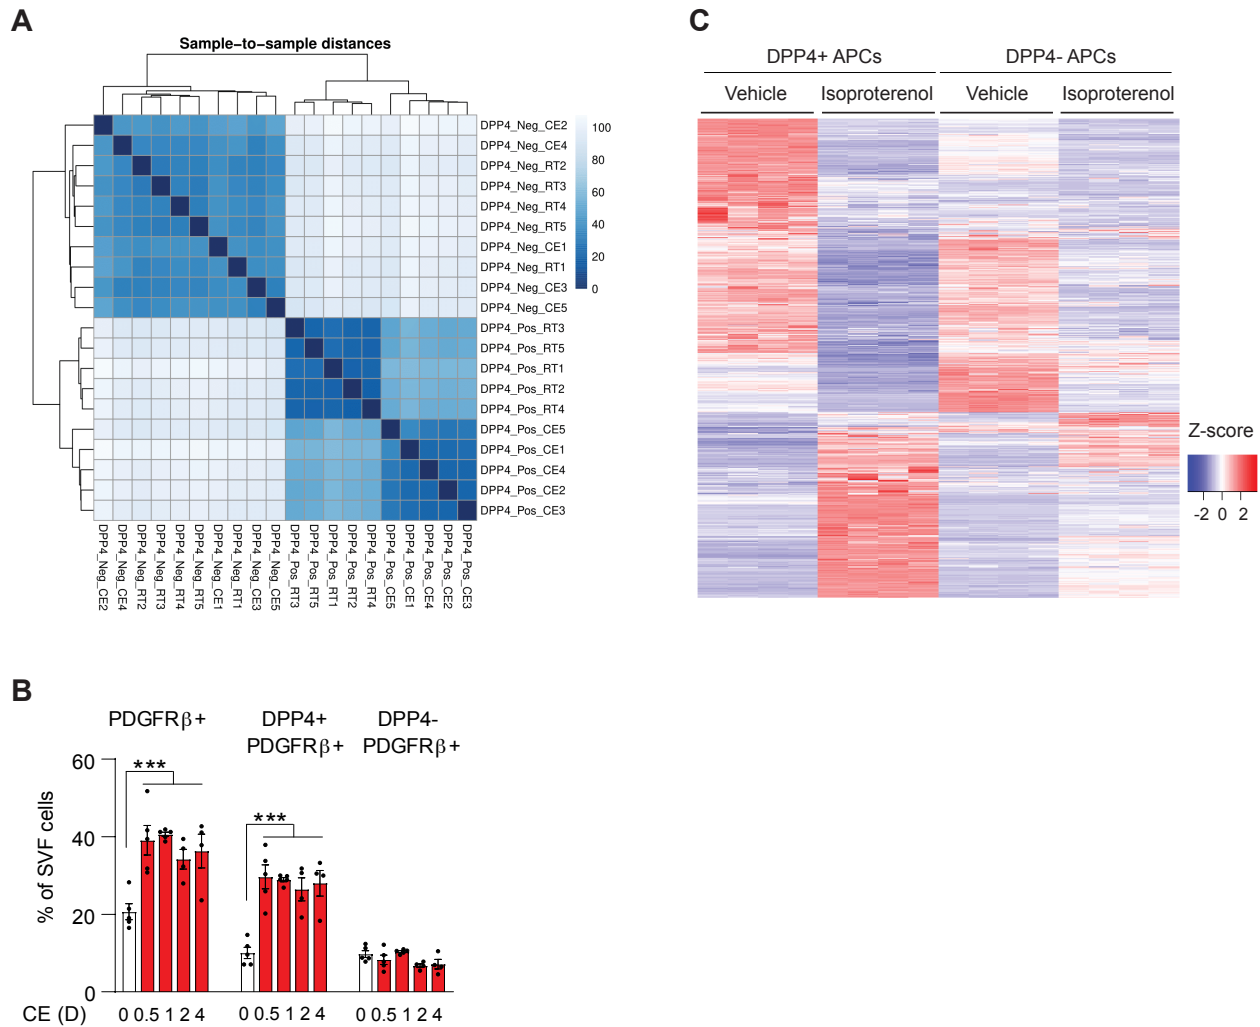

**Fig. S2. Transcriptomic analysis of DPP4<sup>+</sup> and DPP4<sup>-</sup> APCs following acute cold exposure or isoproterenol treatment in vitro.**

**A)** Sample clustering analysis based on transcriptomic data obtained by bulk-RNA-seq.

**B)** The frequencies of total PDGFR $\beta$ <sup>+</sup> cells, DPP4<sup>+</sup> PDGFR $\beta$ <sup>+</sup> cells DPP4<sup>-</sup> PDGFR $\beta$ <sup>+</sup> cells within the stromal vascular fraction (SVF) of iWAT from mice cold exposed (6 °C) for the indicated numbers of days (D). Mice housed in RT (22 °C) were used as control ("0"). For 0, 0.5 and 1, n=5 each group; for 2, 4, n=4 each group. Bars represent mean + s.e.m. \*\*\* denotes  $p < 0.001$  by one-way ANOVA.

**C)** Heat map depicting the change in expression of 4512 genes which are differentially regulated in DPP4<sup>+</sup> and DPP4<sup>-</sup> PDGFR $\beta$ <sup>+</sup> cells upon treatment with isoproterenol for 4 hours in culture. n=5 for each group. Each sample (n) represents cells pooled from six mice.
