# Supplementary material for: Cold-responsive adipocyte progenitors couple adrenergic signaling to immune cell activation to promote beige adipocyte accrual
Source: PubMed Central journal article supplement — Genes Dev. 2021 Oct 1;35(19-20):1333–8. doi: 10.1101/gad.348762.121 (PMC8494206; doi:10.1101/gad.348762.121), 2021-10-01
Supplement: supp_gad.348762.121_Supplemental_Fig_S3.pdf [file supp_gad.348762.121_Supplemental_Fig_S3.pdf]

**A**

## Upregulated genes

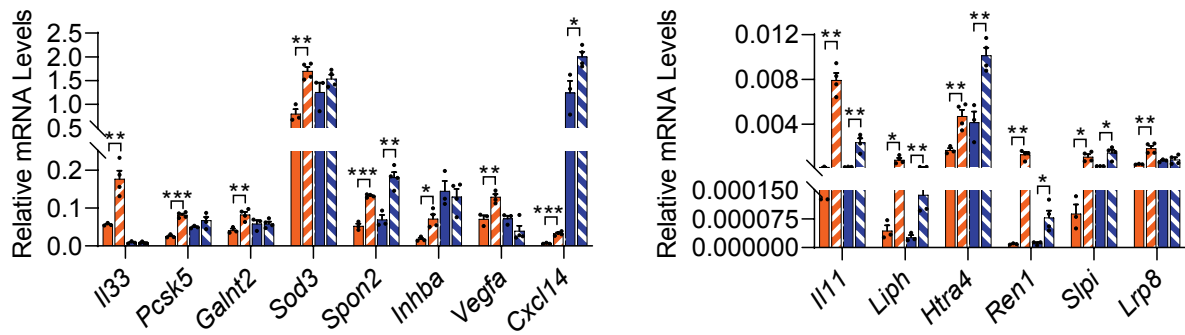**B**

## Downregulated genes

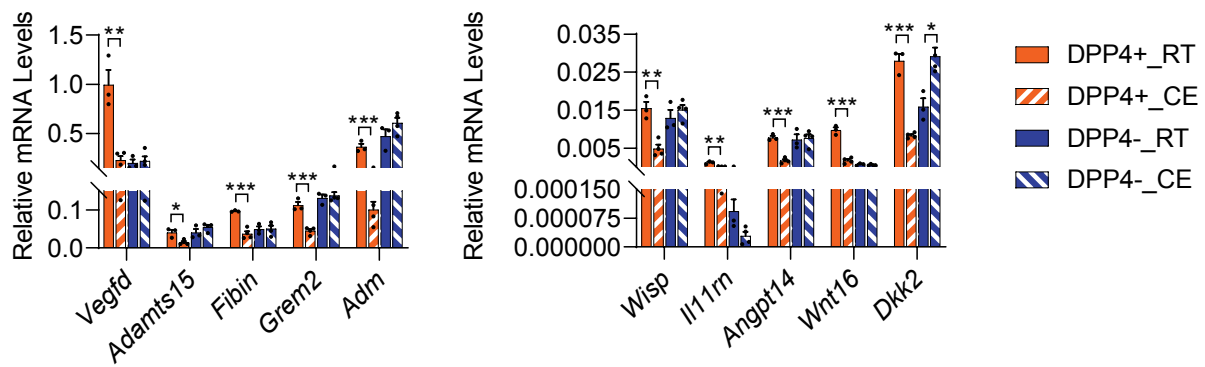

**Fig. S3. Gene expression analysis of putative secreted molecules regulated by cold exposure in PDGFR $\beta$ <sup>+</sup> adipose progenitors.**

**A)** mRNA levels of indicated genes in freshly isolated DPP4<sup>+</sup> and DPP4<sup>-</sup> APCs from iWAT depots of mice housed at room temperature (RT) or exposed to cold (CE) (6 °C) for 1 day. Genes analyzed represent those which encode putative secreted molecules and were identified by bulk-RNA sequencing as upregulated in DPP4<sup>+</sup> cells upon cold exposure (See Fig. 1B and Supplemental Dataset 4).

**B)** mRNA levels of indicated genes in freshly isolated DPP4<sup>+</sup> and DPP4<sup>-</sup> APCs from iWAT depots of mice housed at room temperature (RT) or exposed to cold (CE) for 1 day. Genes analyzed represent those which encode putative secreted molecules and were identified by bulk-RNA sequencing as downregulated in DPP4<sup>+</sup> cells upon cold exposure (See Fig. 1B and Supplemental Dataset 4).

Bars represent mean + s.e.m. \*\*\* denotes  $p < 0.001$  by one-way ANOVA.
