# Supplementary material for: Cold-responsive adipocyte progenitors couple adrenergic signaling to immune cell activation to promote beige adipocyte accrual
Source: PubMed Central journal article supplement — Genes Dev. 2021 Oct 1;35(19-20):1333–8. doi: 10.1101/gad.348762.121 (PMC8494206; doi:10.1101/gad.348762.121), 2021-10-01
Supplement: supp_gad.348762.121_Supplemental_Fig_S4.pdf [file supp_gad.348762.121_Supplemental_Fig_S4.pdf]

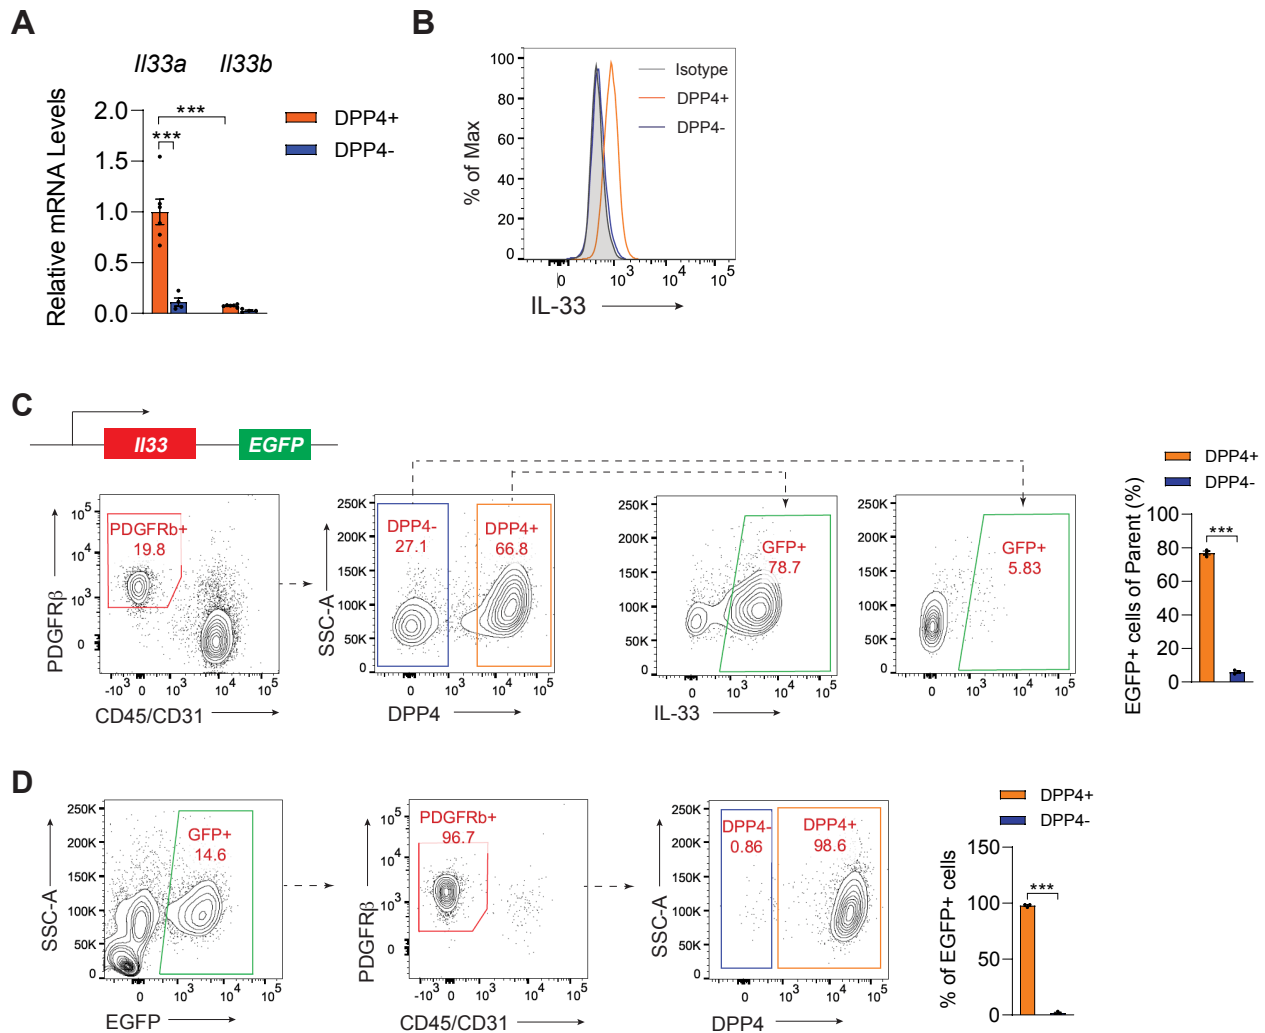

**Fig. S4. DPP4+ APCs are the principal source of IL-33 within adult inguinal WAT.**

**A**) mRNA levels *I133* isoforms in freshly sorted DPP4+ and DPP4- APCs (n=5 for each group).

**B**) Flow cytometry analysis of IL-33 protein expression within DPP4+ APCs and DPP4- APCs.

**C**) *I133*-EGFP reporter mouse contains an EGFP reporter inserted into 3' UTR of *I133* gene. (left) Flow cytometry analysis depicting the percentage of adult iWAT DPP4+ APCs and DPP4- APCs expressing EGFP. (right) Bar graph depicting the percentage of DPP4+ APCs and DPP4- APCs expressing that express EGFP based on quantification of flow cytometry data. (n=3 each group)

**D**) (left) Flow cytometry analysis depicting the percentage of all iWAT EGFP+ cells expressing markers of either DPP4+ APCs or DPP4- APCs. (right) Bar graph depicting the percentage of EGFP+ cells that represent either DPP4+ APCs or DPP4- APCs (n=3 each group).
