# Supplementary material for: Cold-responsive adipocyte progenitors couple adrenergic signaling to immune cell activation to promote beige adipocyte accrual
Source: PubMed Central journal article supplement — Genes Dev. 2021 Oct 1;35(19-20):1333–8. doi: 10.1101/gad.348762.121 (PMC8494206; doi:10.1101/gad.348762.121), 2021-10-01
Supplement: supp_gad.348762.121_Supplemental_Fig_S5.pdf [file supp_gad.348762.121_Supplemental_Fig_S5.pdf]

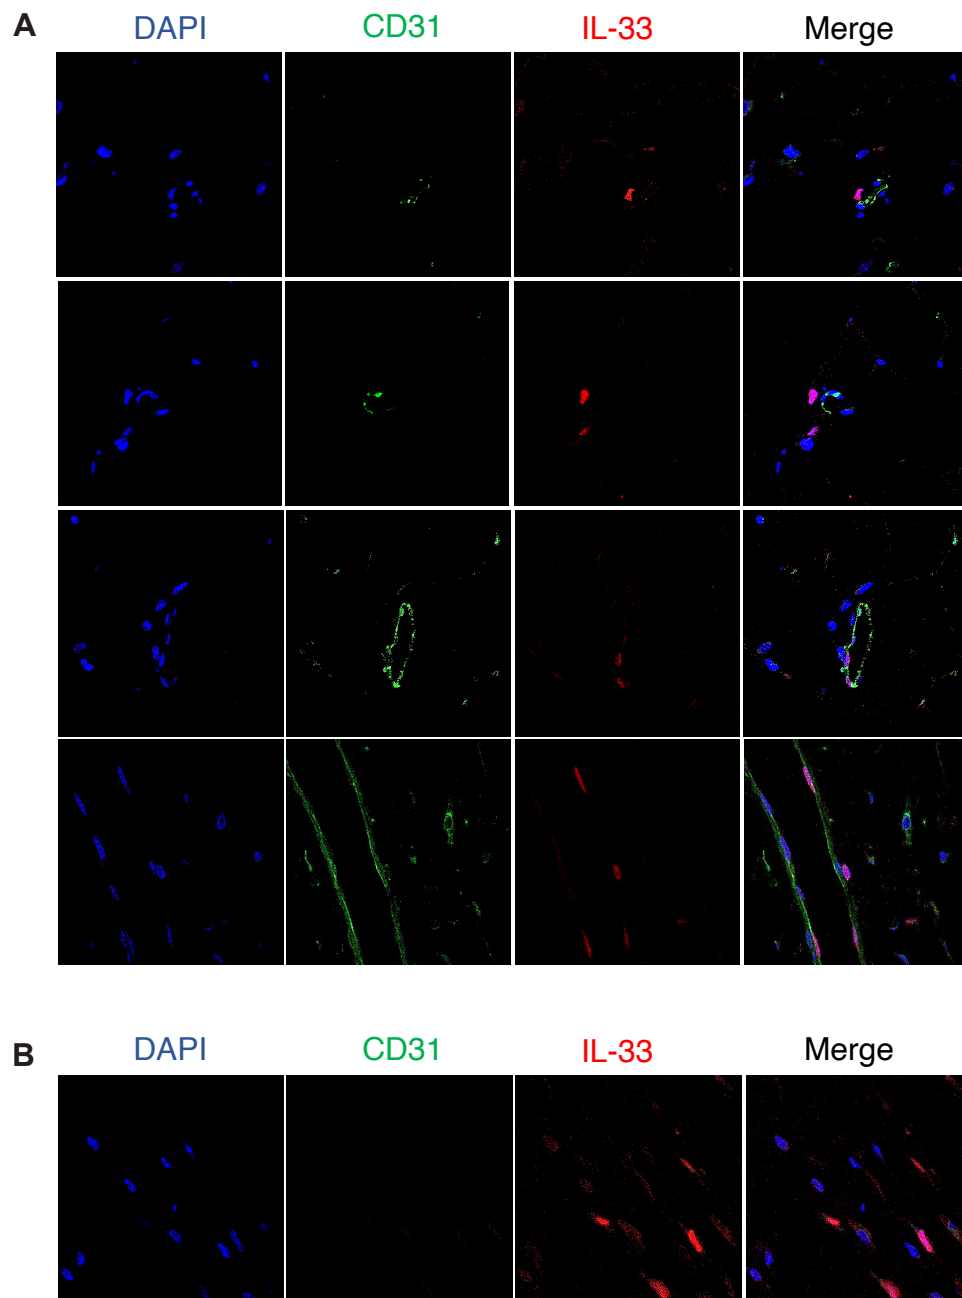

**Fig. S5. Localization of IL33-expressing cells in adult iWAT.**

**A,B)** Representative 63x magnification confocal immunofluorescence images of iWAT from wildtype mice housed at room temperature. Sections were stained with anti-CD31 (green) and anti-IL-33 (red) antibodies and counterstained with DAPI (blue). Composite images were generated by digital overlay. Panels in **A)** highlight perivascular localization of IL-33 expression. Panels in **B)** highlight presence of IL-33 in cells of the reticular interstitium surrounding the iWAT depot.
