# Supplementary material for: Cold-responsive adipocyte progenitors couple adrenergic signaling to immune cell activation to promote beige adipocyte accrual
Source: PubMed Central journal article supplement — Genes Dev. 2021 Oct 1;35(19-20):1333–8. doi: 10.1101/gad.348762.121 (PMC8494206; doi:10.1101/gad.348762.121), 2021-10-01
Supplement: supp_gad.348762.121_Supplemental_Fig_S6.pdf [file supp_gad.348762.121_Supplemental_Fig_S6.pdf]

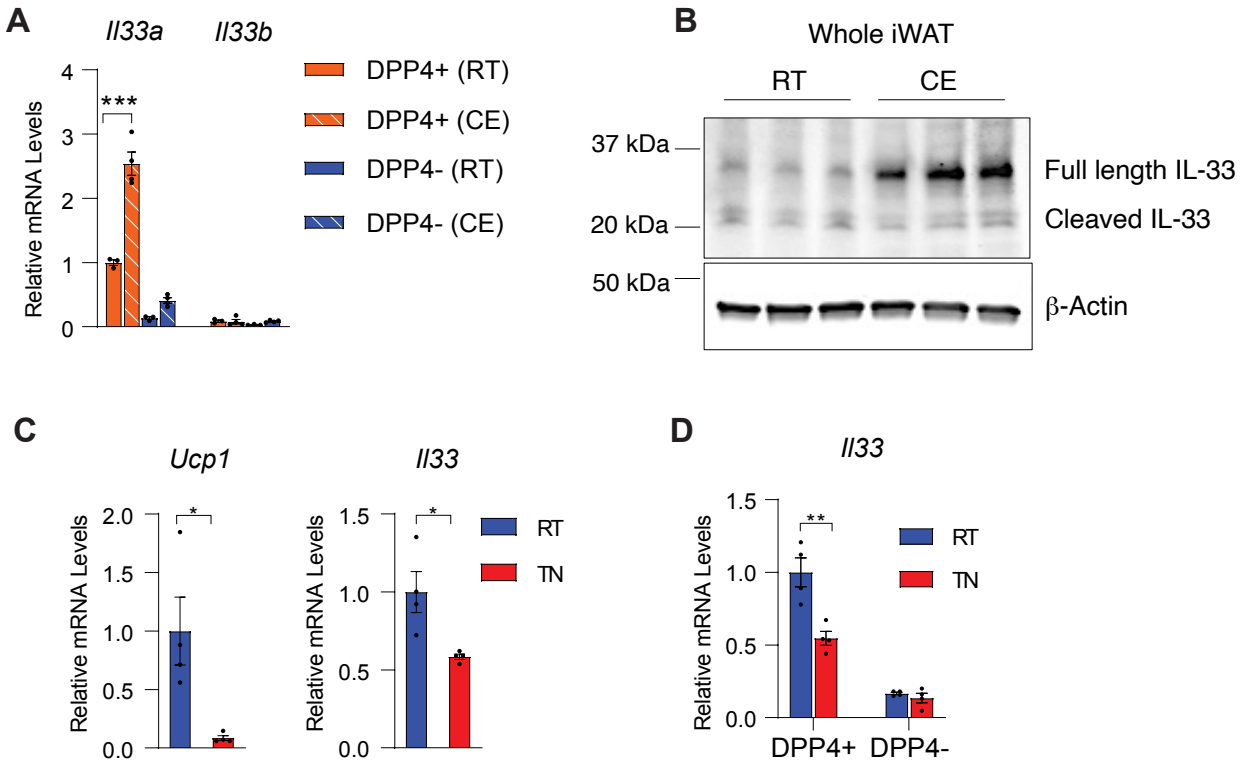

**Fig. S6. *IL33* expression in DPP4+ APCs is regulated by environmental temperature.**

**A)** mRNA levels of indicated *IL33* isoforms in freshly sorted DPP4+ and DPP4- APCs isolated from adult iWAT depots of mice housed at room temperature (RT) or animals exposed to cold for 1 day (n=5 for each group).

**B)** Western blot analysis of IL-33 protein expression in whole iWAT depots of mice housed at room temperature (RT) or animals exposed to cold for 1 day (n=3 for each group).

**C)** mRNA levels of *Ucp1* and *IL33* in the whole inguinal WAT from mice maintained at either room temperature (RT) or mice that were switched from room temperature housing to thermoneutral housing (TN) for 6 weeks prior to analysis. n=4 for each group.

**D)** mRNA levels of *IL33* in freshly sorted DPP4+ and DPP4- APCs from iWAT of mice maintained at RT or TN housing as described in (i). n=4 for each group.

Representative data from at least two experiments is shown. In all panels, bars represent mean + s.e.m. \* $p < 0.05$ , \*\* $p < 0.01$  or \*\*\* $p < 0.001$  by one-way or two-way ANOVA.
