# Supplementary material for: Cold-responsive adipocyte progenitors couple adrenergic signaling to immune cell activation to promote beige adipocyte accrual
Source: PubMed Central journal article supplement — Genes Dev. 2021 Oct 1;35(19-20):1333–8. doi: 10.1101/gad.348762.121 (PMC8494206; doi:10.1101/gad.348762.121), 2021-10-01
Supplement: supp_gad.348762.121_Supplemental_Fig_S8.pdf [file supp_gad.348762.121_Supplemental_Fig_S8.pdf]

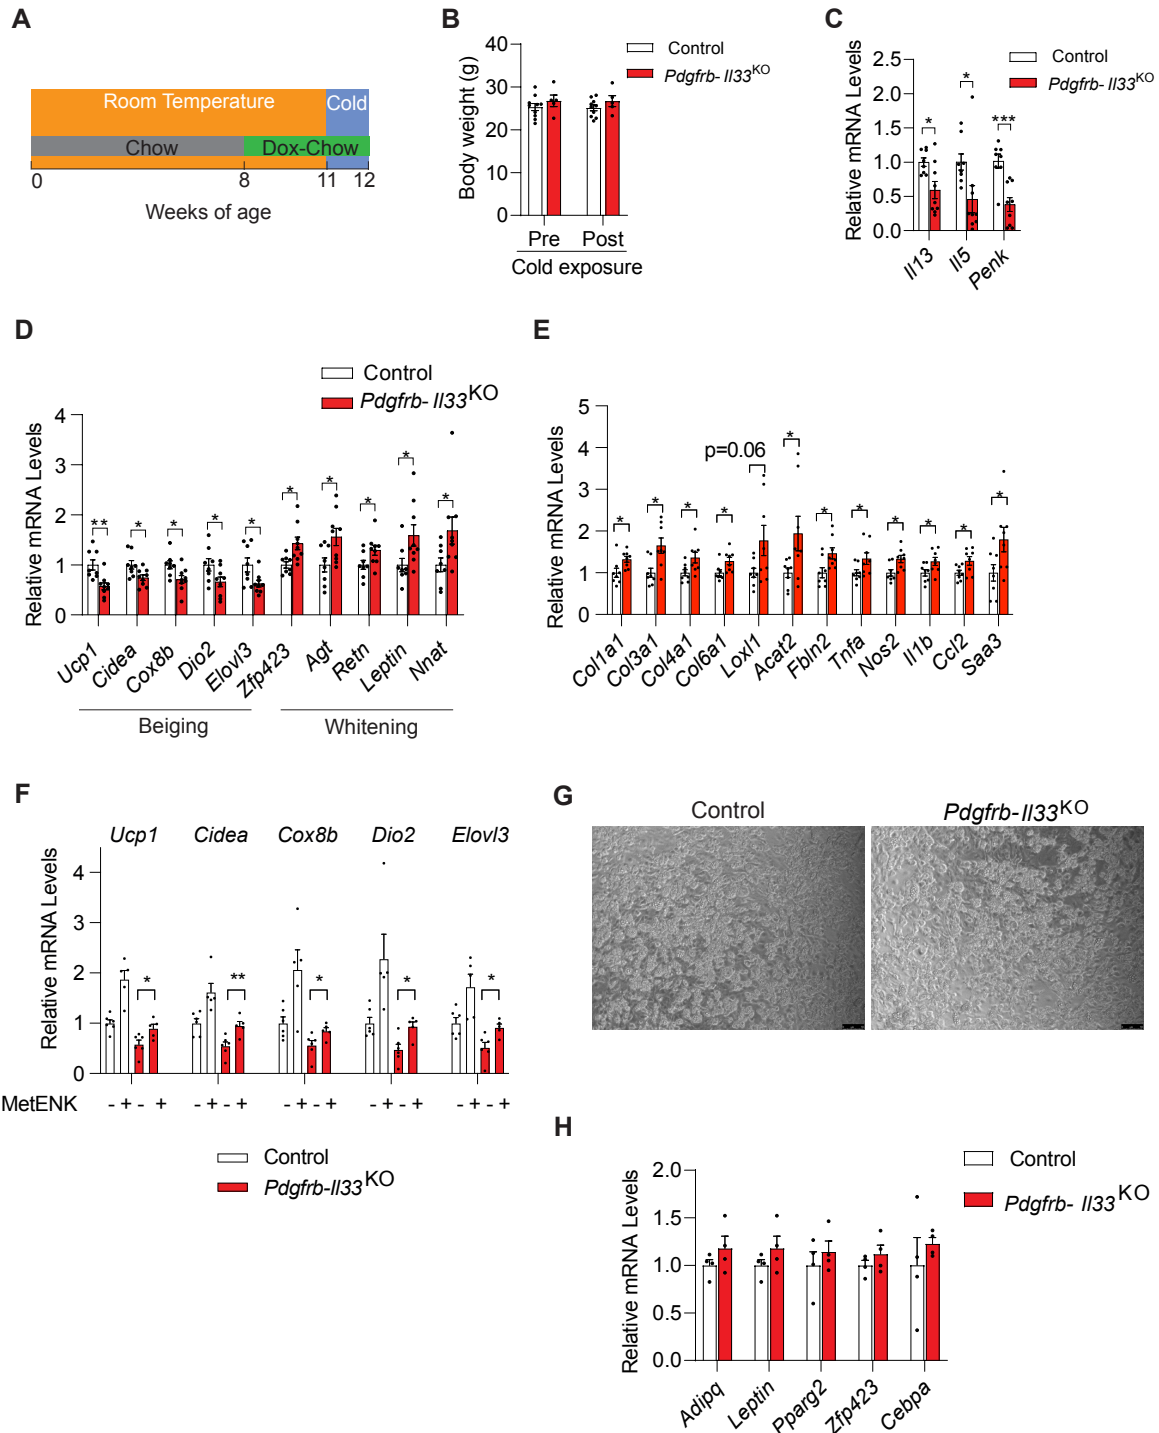

**Fig. S8. Inducible inactivation of *I133* in PDGFR $\beta$ <sup>+</sup> cells of adult mice impairs cold-induced iWAT thermogenic remodeling**

**A)** Experimental design: Room temperature housed 8 weeks-old *Pdgfrb-1133*<sup>KO</sup> and Control mice were switched to a doxycycline-containing chow diet (Dox-Chow) for 3

weeks to ensure gene inactivation. Mice were then cold exposed for 7 days prior to analysis.

**B)** Body weights before pre- and post- or cold exposure. Control, n=11; *Pdgfrb-Il33*<sup>KO</sup>, n=5.

**C)** mRNA levels of ILC2-expressing genes within whole iWAT following cold exposure. Control, n=8; *Pdgfrb-Il33*<sup>KO</sup>, n=9.

**D)** mRNA levels of indicated beige adipocyte selective genes and white adipocyte selective genes within whole iWAT depots following cold exposure. Control, n=8; *Pdgfrb-Il33*<sup>KO</sup>, n=9.

**E)** mRNA levels of indicated genes related to extracellular matrix remodeling and inflammation within whole iWAT depots following cold exposure. Control, n=8; *Pdgfrb-Il33*<sup>KO</sup>, n=8.

**F)** mRNA levels of indicated beige adipocyte selective genes within whole iWAT depots of Control and *Pdgfrb-Il33*<sup>KO</sup> mice treated exposed to cold temperatures for one week and treated with or without MetENK. Control + vehicle, n=6; Control + MetENK, n=5; *Pdgfrb-Il33*<sup>KO</sup> + vehicle, n=6; *Pdgfrb-Il33*<sup>KO</sup> + MetENK, n=5.

**G)** Representative brightfield images of the differentiated adipocytes induced from isolated DPP4+ APCs of Control and *Pdgfrb-Il33*<sup>KO</sup> mice. The cells were pooled from both inguinal depots of 4 mice.

**H)** mRNA levels of indicated adipocyte-selective transcripts within cultures of differentiated adipocytes induced from isolated DPP4+ APCs of Control and *Pdgfrb-Il33*<sup>KO</sup> mice. The cells were pooled from both inguinal depots of 4 mice.

In all panels, bars represent mean + s.e.m. \* $p < 0.05$ , \*\* $p < 0.01$  or \*\*\* $p < 0.001$  by two-tailed unpaired Student's *t*-test.
