# Supplementary material for: Cold-responsive adipocyte progenitors couple adrenergic signaling to immune cell activation to promote beige adipocyte accrual
Source: PubMed Central journal article supplement — Genes Dev. 2021 Oct 1;35(19-20):1333–8. doi: 10.1101/gad.348762.121 (PMC8494206; doi:10.1101/gad.348762.121), 2021-10-01
Supplement: supp_gad.348762.121_Supplemental_Table_S1.pdf [file supp_gad.348762.121_Supplemental_Table_S1.pdf]

**Table S1: Primers Sequences used for qPCR or ChIP-PCR**

| <b>Gene</b>     | <b>Forward (5' -3')</b>   | <b>Reverse (5' -3')</b>        |
|-----------------|---------------------------|--------------------------------|
| <i>Rps18</i>    | CATGCAAACCCACGACAGTA      | CCTCACGCAGCTTGTGTCTA           |
| <i>Adipoq</i>   | AGATGGCACTCCTGGAGAGAA     | TTCTCCAGGCTCTCCTTTCT           |
| <i>Pparg2</i>   | GCATGGTGCCTTCGCTGA        | TGGCATCTCTGTGTCAACCATG         |
| <i>Cebpa</i>    | CAAGAACAGCAACGAGTACCG     | GTCACTGGTCAACTCCAGCAC          |
| <i>Leptin</i>   | GAGACCCCTGTGTGCGTTC       | CTGCGTGTGTGAAATGTCATTG         |
| <i>Zfp423</i>   | CAGGCCCAACAAGAACAAG       | GTATCCTCGCAGTAGTCGCACA         |
| <i>Il33</i>     | ATTTCCCCGGCAAAGTTCAG      | AACGGAGTCTCATGCAGTAGA          |
| <i>Il33a</i>    | GCTGCAGAAGGGAGAAATCACG    | GGAGTTGGAATACTTCATTCTAGGTCTCAT |
| <i>Il33b</i>    | GGCTCACTGCAGGAAAGTACAGCA  | GGAGTTGGAATACTTCATTCTAGGTCTCAT |
| <i>Il13</i>     | CCTGGCTCTTGCTTGCCTT       | GGTCTTGTGTGATGTTGCTCA          |
| <i>Il5</i>      | CTCTGTTGACAAGCAATGAGACG   | TCTTCAGTATGTCTAGCCCCTG         |
| <i>Penk</i>     | TGCGCTAAATGCACGTACC       | TCCCAGATTTTGAAAGAAGGCAG        |
| <i>Ucp1</i>     | AGGCTTCCAGTACCATTAGGT     | CTGAGTGAGGCAAAGCTGATTT         |
| <i>Cidea</i>    | TGACATTCATGGGATTGCAGAC    | CATGGTTTGAAACTCGAAAAGGG        |
| <i>Cox8b</i>    | TGTGGGGATCTCAGCCATAGT     | AGTGGGCTAAGACCCATCCTG          |
| <i>Dio2</i>     | CATTGATGAGGCTCACCCCTTC    | GGTTCGGTGCTTCTTAACCT           |
| <i>Elovl3</i>   | GTGTGCTTTGCCATCTACACG     | CTCCCAGTTCAACAACCTTGC          |
| <i>Agt</i>      | TCTCCTTTACCACAACAAGAGCA   | CTTCTCATTACAGGGGAGGT           |
| <i>Retn</i>     | AAGAACCTTTCATTTCCCCTCCT   | GTCCAGCAATTTAAGCCAATGTT        |
| <i>Nnat</i>     | CACAGCCCATTGCGAGAAGT      | GGCAAGTGCTACTCTGACGA           |
| <i>Il11</i>     | TGTTCTCCTAACCCGATCCCT     | CAGGAAGCTGCAAAGATCCCA          |
| <i>Ren1</i>     | CTCTCTGGGCACTCTTGTTGC     | GGGAGGTAAGATTGGTCAAGGA         |
| <i>Liph</i>     | GCTTGGTGAAATCAGACACGG     | AGTCTCACGGAGAGTCCTGTA          |
| <i>Spli</i>     | GGCCTTTTACCTTTCACGGTG     | TACGGCATTGTGGCTTCTCAA          |
| <i>Lrp8</i>     | TGCCTTCAGGGGCTAAATGAG     | CCAGGGTGGCATTACACTTA           |
| <i>Htra4</i>    | AGCCACCGTCAAAGACATCG      | TGTGGTGCTGACAATCCCTG           |
| <i>Inhba</i>    | TGAGAGGATTTCTGTTGGCAAG    | TGACATCGGGTCTCTTCTTCA          |
| <i>Sod3</i>     | CCTTCTTGTTCTACGGCTTGC     | TCGCCTATCTTCTCAACCAGG          |
| <i>Galnt2</i>   | GGAGATGAGAAAGCACAGGGT     | TGCCTCCTGGTTAAAGTCTGG          |
| <i>Vegfa</i>    | GCACATAGAGAGAATGAGCTTCC   | CTCCGCTCTGAACAAGGCT            |
| <i>Pcsk5</i>    | GCGGAGGCAGATCGCATAG       | AGGTCATAATCCCTCTTGTTCT         |
| <i>Spon2</i>    | ATGGAAAACGTGAGTCTTGCC     | TGATGCTGTATCTAGCCAGAGG         |
| <i>Vegfd</i>    | TTGAGCGATCATCCCGGTC       | GCGTGAGTCCATACTGGCAAG          |
| <i>Cemip</i>    | TGGCAGGAGCCACTACTACTG     | CCCTTTCGTTCTGGGCTTTTAAAT       |
| <i>Il1rn</i>    | GCTCATTGCTGGGTACTIONTACAA | CCAGACTTGGCACAAGACAGG          |
| <i>Wisp1</i>    | CAGCACCCTAGAGGAAACGA      | CTGGGCACATATCTTACAGCATT        |
| <i>Adamts15</i> | TACTGACTTCTGGATAGTGGG     | TGGCTCAAAGTGTAGCTTGTG          |
| <i>Fibin</i>    | TTCCCGAAGTTGATCTGGATGG    | CGAAGTAATGATGCAAAGTCCCA        |
| <i>Wnt16</i>    | CAGGGCAACTGGATGTGGTT      | CTAGGCAGCAGGTACGGTT            |
| <i>Adm</i>      | CACCCTGATGTTATTGGGTTCA    | TTAGCGCCCACTTATTCCAAT          |
| <i>Grem2</i>    | GGTAGCTGAAACACGGAAGAA     | TCTTGCACCAGTCACTCTTGA          |
| <i>Dkk2</i>     | CTGATGCGGGTCAAGGATTCA     | CTCCCCTCCTAGAGAGGACTT          |
| <i>Angpt4</i>   | CAGCCAGCTATGCTACTAGATGG   | CCTCTGGAGGCTATTGGAGC           |
| <i>Cdkn2a</i>   | CGCAGGTTCTTGGTCACTGT      | TGTTACGAAAGCCAGAGCG            |

|               |                       |                        |
|---------------|-----------------------|------------------------|
| <i>Cdkn1a</i> | CCTGGTGATGTCCGACCTG   | CCATGAGCGCATCGCAATC    |
| <i>Pai1</i>   | TTCAGCCCTTGCTTGCCTC   | ACACTTTTACTCCGAAGTCGGT |
| <i>Adprc</i>  | TCTCTAGGAAAGCCCAGATCG | GTCCACACCAGGAGTGAGC    |
| <i>Adp</i>    | GGCAGCCTGATGTTGAGGT   | GCGTACTCCGCTAAAAAGTCAC |
| <i>Sir</i>    | GCTGACGACTTCGACGACG   | TCGGTCAACAGGAGGTTGTCT  |
| <i>Adrb1</i>  | CTCATCGTGGTGGGTAACGTG | ACACACAGCACATCTACCGAA  |
| <i>Adrb2</i>  | ATGTCGGTTATCGTCCTGGC  | GGTTTGTAGTCGCTCGAACTTG |
| <i>Adrb3</i>  | GGCCCTCTCTAGTTCCCAG   | TAGCCATCAAACCTGTTGAGC  |
| ChIP-P1       | CTTGGCAGACCACACTTCCT  | ACCGTTATTACCAGGCAGG    |
| ChIP-P2       | TGGGAAGGTGTCATTGCGAA  | AGTGCCGCTTTTATGGGGTT   |
| ChIP-P3       | TCAGCACCAGCTCCTTTCTG  | CTAGGTGCTGGGAAGCAGTG   |
